# Supplementary material for: The Influence of Circadian Rhythm on Cancer Cells Targeting and Transfection Efficiency of a Polycation-Drug/Gene Delivery Vector
Source: MDPI journal article supplement (doi:10.3390/polym14040681), 2022-02-10
Supplement: s1 [file s1]

## Supplementary Materials

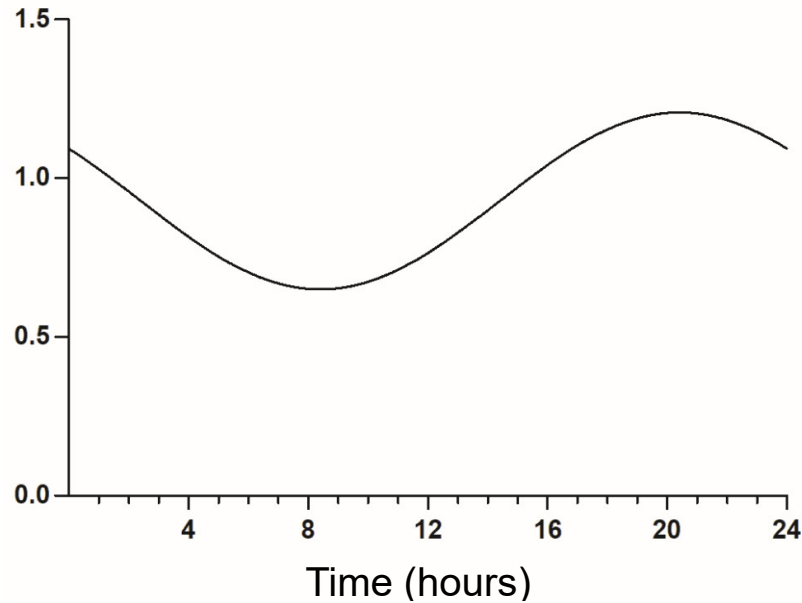

**Figure S1.** CircWave analysis of *bmal1* rhythmicity after synchronization of HeLa cells.

On the 3th day of culture, cells were synchronized with 0.1  $\mu$ M of dexamethasone for 2 h. After synchronization, the medium was replaced by fresh, dexamethasone free medium and cells were collected every 4 h through a cycle of 24 h. Relative mRNA expression levels were determined via qPCR, normalized to Cyclophilin A and cell synchronization was further confirmed by *bmal1* expression analysis by CircWave (p-value= 0.026; center of gravity= 23.38).

**Table S1.** Statistical analysis of Bonferroni's multiple comparisons test for the quantification of cell-associated MTX fluorescence on Hela cells.

|            | P-value |              |
|------------|---------|--------------|
|            | MTX     | PEI/MTX/pDNA |
| T0 vs. T4  | 0,0044  | <0,0001      |
| T0 vs. T8  | <0,0001 | <0,0001      |
| T0 vs. T12 | 0,0194  | <0,0001      |
| T0 vs. T16 | 0,2468  | <0,0001      |
| T0 vs. T20 | 0,2607  | 0,0102       |
| T4 vs. T8  | 0,0310  | <0,0001      |
| T4 vs. T12 | >0,9999 | >0,9999      |
| T4 vs. T16 | >0,9999 | <0,0001      |

|             |         |         |
|-------------|---------|---------|
| T4 vs. T20  | >0,9999 | <0,0001 |
| T8 vs. T12  | 0,0071  | <0,0001 |
| T8 vs. T16  | 0,0005  | <0,0001 |
| T8 vs. T20  | 0,0004  | <0,0001 |
| T12 vs. T16 | >0,9999 | <0,0001 |
| T12 vs. T20 | >0,9999 | <0,0001 |
| T16 vs. T20 | >0,9999 | 0,0055  |

### P-value

#### MTX vs. PEI/pDNA/MTX

|     |         |
|-----|---------|
| T0  | <0,0001 |
| T4  | <0,0001 |
| T8  | <0,0001 |
| T12 | <0,0001 |
| T16 | <0,0001 |
| T20 | <0,0001 |

MTX, methotrexate; PEI, polyethylenimine; pDNA, p53 encoded plasmid DNA.

**Table S2.** Significance (p-value) and center of gravity values for the quantification of cell-internalized MTX as determined by CircWave analysis.

|         | MTX      | PEI/pDNA/MTX |
|---------|----------|--------------|
| CG      | 8.82     | 8.48         |
| P-value | 4.4x10-5 | 2x10-6       |

CG, center of gravity.

**Table S3.** Statistical analysis of Bonferroni's multiple comparisons test for quantification of p53 protein levels between time points on Hela cells.

| P-value   |          |              |
|-----------|----------|--------------|
|           | PEI/pDNA | PEI/MTX/pDNA |
| T0 vs. T4 | <0,0001  | <0,0001      |
| T0 vs. T8 | <0,0001  | <0,0001      |

|             |         |         |
|-------------|---------|---------|
| T0 vs. T12  | <0,0001 | <0,0001 |
| T0 vs. T16  | <0,0001 | <0,0001 |
| T0 vs. T20  | <0,0001 | <0,0001 |
| T4 vs. T8   | <0,0001 | <0,0001 |
| T4 vs. T12  | <0,0001 | <0,0001 |
| T4 vs. T16  | <0,0001 | <0,0001 |
| T4 vs. T20  | <0,0001 | <0,0001 |
| T8 vs. T12  | <0,0001 | <0,0001 |
| T8 vs. T16  | <0,0001 | <0,0001 |
| T8 vs. T20  | <0,0001 | <0,0001 |
| T12 vs. T16 | <0,0001 | <0,0001 |
| T12 vs. T20 | <0,0001 | <0,0001 |
| T16 vs. T20 | 0,0003  | <0,0001 |

### P-value

PEI/pDNA vs. PEI/pDNA/MTX

|     |         |
|-----|---------|
| T0  | <0,0001 |
| T4  | <0,0001 |
| T8  | <0,0001 |
| T12 | <0,0001 |
| T16 | <0,0001 |
| T20 | <0,0001 |

**Table S4.** Significance (p-value) and center of gravity values for the quantification of p53 protein levels as determined by CircWave analysis on Hela cells.

|         | PEI/pDNA | PEI/pDNA/MTX |
|---------|----------|--------------|
| CG      | 10.73    | 10.63        |
| P-value | 0.0029   | 0.000201     |

**Table S5.** Statistical analysis of Bonferroni's multiple comparisons test for the quantification of cell-associated MTX fluorescence on C33A cells.

|             | <b>P-value</b> |              |
|-------------|----------------|--------------|
|             | MTX            | PEI/MTX/pDNA |
| T0 vs. T4   | <0,0001        | <0,0001      |
| T0 vs. T8   | <0,0001        | <0,0001      |
| T0 vs. T12  | <0,0001        | <0,0001      |
| T0 vs. T16  | <0,0001        | <0,0001      |
| T0 vs. T20  | <0,0001        | <0,0001      |
| T4 vs. T8   | <0,0001        | <0,0001      |
| T4 vs. T12  | <0,0001        | <0,0001      |
| T4 vs. T16  | >0,9999        | <0,0001      |
| T4 vs. T20  | 0,0053         | <0,0001      |
| T8 vs. T12  | 0,0026         | <0,0001      |
| T8 vs. T16  | <0,0001        | <0,0001      |
| T8 vs. T20  | <0,0001        | <0,0001      |
| T12 vs. T16 | <0,0001        | <0,0001      |
| T12 vs. T20 | <0,0001        | <0,0001      |
| T16 vs. T20 | 0,0837         | <0,0001      |

**P-value**

MTX vs. PEI/pDNA/MTX

|     |         |
|-----|---------|
| T0  | <0,0001 |
| T4  | <0,0001 |
| T8  | <0,0001 |
| T12 | <0,0001 |
| T16 | <0,0001 |
| T20 | <0,0001 |

**Table S6.** Significance (p-value) and center of gravity values for the quantification of cell-internalized MTX as determined by CircWave analysis on C33A cells.

|    | <b>MTX</b> | <b>PEI/pDNA/MTX</b> |
|----|------------|---------------------|
| CG | 10.91      | 10.08               |

|         |                    |   |
|---------|--------------------|---|
| P-value | 3x10 <sup>-6</sup> | 0 |
|---------|--------------------|---|

**Table S7.** Statistical analysis of Bonferroni's multiple comparisons test for the quantification of cell-associated MTX fluorescence on fibroblast cells.

| P-value     |         |              |
|-------------|---------|--------------|
|             | MTX     | PEI/MTX/pDNA |
| T0 vs. T4   | >0,9999 | <0,0001      |
| T0 vs. T8   | <0,0001 | <0,0001      |
| T0 vs. T12  | <0,0001 | <0,0001      |
| T0 vs. T16  | <0,0001 | <0,0001      |
| T0 vs. T20  | <0,0001 | <0,0001      |
| T4 vs. T8   | <0,0001 | <0,0001      |
| T4 vs. T12  | <0,0001 | <0,0001      |
| T4 vs. T16  | <0,0001 | 0,0809       |
| T4 vs. T20  | <0,0001 | >0,9999      |
| T8 vs. T12  | <0,0001 | <0,0001      |
| T8 vs. T16  | 0,5042  | <0,0001      |
| T8 vs. T20  | 0,0371  | <0,0001      |
| T12 vs. T16 | <0,0001 | <0,0001      |
| T12 vs. T20 | <0,0001 | <0,0001      |
| T16 vs. T20 | >0,9999 | 0,0082       |

### P-value

MTX vs. PEI/pDNA/MTX

|     |         |
|-----|---------|
| T0  | <0,0001 |
| T4  | <0,0001 |
| T8  | <0,0001 |
| T12 | <0,0001 |
| T16 | <0,0001 |
| T20 | <0,0001 |

**Table S8.** Significance (p-value) and center of gravity values for the quantification of cell-internalized MTX as determined by CircWave analysis on fibroblasts.

|    | MTX   | PEI/pDNA/MTX |
|----|-------|--------------|
| CG | 14.38 | 9.2          |

|         |   |   |
|---------|---|---|
| P-value | 0 | 0 |
|---------|---|---|

**Table S9.** Statistical analysis of Bonferroni's multiple comparisons test for the quantification of p53 protein levels between time points on C33A cells.

| <b>P-value</b> |          |              |
|----------------|----------|--------------|
|                | PEI/pDNA | PEI/MTX/pDNA |
| T0 vs. T4      | 0,1172   | 0,1717       |
| T0 vs. T8      | <0,0001  | <0,0001      |
| T0 vs. T12     | <0,0001  | <0,0001      |
| T0 vs. T16     | <0,0001  | <0,0001      |
| T0 vs. T20     | <0,0001  | <0,0001      |
| T4 vs. T8      | <0,0001  | <0,0001      |
| T4 vs. T12     | <0,0001  | <0,0001      |
| T4 vs. T16     | <0,0001  | <0,0001      |
| T4 vs. T20     | <0,0001  | <0,0001      |
| T8 vs. T12     | <0,0001  | <0,0001      |
| T8 vs. T16     | <0,0001  | <0,0001      |
| T8 vs. T20     | >0,9999  | 0,0002       |
| T12 vs. T16    | >0,9999  | <0,0001      |
| T12 vs. T20    | <0,0001  | <0,0001      |
| T16 vs. T20    | <0,0001  | <0,0001      |

### **P-value**

PEI/pDNA vs. PEI/pDNA/MTX

|     |         |
|-----|---------|
| T0  | 0,0202  |
| T4  | 0,0301  |
| T8  | <0,0001 |
| T12 | <0,0001 |
| T16 | <0,0001 |
| T20 | <0,0001 |

**Table S10.** Significance (p-value) and center of gravity values for the quantification of p53 protein levels as determined by CircWave analysis on C33A cells.

|         | <b>PEI/pDNA</b> | <b>PEI/pDNA/MTX</b> |
|---------|-----------------|---------------------|
| CG      | 14.02           | 13.7                |
| P-value | 0               | 0                   |

**Table S11.** Statistical analysis of Bonferroni's multiple comparisons test for the quantification of p53 protein levels between time points on fibroblasts.

| <b>P-value</b> |          |              |
|----------------|----------|--------------|
|                | PEI/pDNA | PEI/MTX/pDNA |
| T0 vs. T4      | <0,0001  | <0,0001      |
| T0 vs. T8      | <0,0001  | <0,0001      |
| T0 vs. T12     | <0,0001  | <0,0001      |
| T0 vs. T16     | <0,0001  | <0,0001      |
| T0 vs. T20     | <0,0001  | <0,0001      |
| T4 vs. T8      | <0,0001  | <0,0001      |
| T4 vs. T12     | 0,0179   | 0,0562       |
| T4 vs. T16     | <0,0001  | <0,0001      |
| T4 vs. T20     | <0,0001  | <0,0001      |
| T8 vs. T12     | 0,0100   | <0,0001      |
| T8 vs. T16     | <0,0001  | 0,0009       |
| T8 vs. T20     | <0,0001  | 0,7714       |
| T12 vs. T16    | <0,0001  | <0,0001      |
| T12 vs. T20    | <0,0001  | <0,0001      |
| T16 vs. T20    | 0,0091   | 0,1542       |

**P-value**  
PEI/pDNA vs. PEI/pDNA/MTX

|     |         |
|-----|---------|
| T0  | >0,9999 |
| T4  | <0,0001 |
| T8  | <0,0001 |
| T12 | <0,0001 |
| T16 | <0,0001 |
| T20 | <0,0001 |

**Table S12.** Significance (p-value) and center of gravity values for the quantification of p53 protein levels as determined by CircWave analysis on fibroblast cells.

|         | PEI/pDNA           | PEI/pDNA/MTX |
|---------|--------------------|--------------|
| CG      | 14.56              | 13.98        |
| P-value | 2x10 <sup>-6</sup> | 0            |
